# Supplementary material
Source: publisher figshare collection journal article supplement (https://karger.figshare.com/articles/dataset/_/5104543)
Supplement: Supplementary file 1 [file 1]

**Supplemental Table 1.** Candidate Genes Evaluated in this Study.

| HUGO SYMBOL | Approved Gene Name                                                                                                   | Location         | GeneID |
|-------------|----------------------------------------------------------------------------------------------------------------------|------------------|--------|
| ACE         | angiotensin I converting enzyme (peptidyl-dipeptidase A) 1                                                           | 17q23            | 1636   |
| ADRB2       | adrenergic, beta-2-, receptor, surface                                                                               | 5q31-q32         | 154    |
| AGT         | angiotensinogen (serine (or cysteine) proteinase inhibitor, clade A (alpha-1 antiproteinase, antitrypsin), member 8) | 1q41-qter        | 183    |
| AGTR1       | angiotensin II receptor, type 1                                                                                      | 3q21-q25         | 185    |
| ANG         | angiogenin, ribonuclease, RNase A family, 5                                                                          | 14q11.1-q11.2    | 283    |
| ANGPT2      | angiopoietin 2                                                                                                       | 8p23             | 285    |
| APOA1       | apolipoprotein A-I                                                                                                   | 11q23-q24        | 335    |
| APOB        | apolipoprotein B (including Ag(x) antigen)                                                                           | 2p24-p23         | 338    |
| APOC3       | apolipoprotein C-III                                                                                                 | 11q23-qter       | 345    |
| APOE        | apolipoprotein E                                                                                                     | 19q13.2          | 348    |
| AQP2        | aquaporin 2 (collecting duct)                                                                                        | 12q12-q13        | 359    |
| CARD15      | caspase recruitment domain family, member 15                                                                         | 16q12            | 64127  |
| CCL2        | chemokine (C-C motif) ligand 2                                                                                       | 17q11.2-q21.1    | 6347   |
| CCR2        | chemokine (C-C motif) receptor 2                                                                                     | 3p21             | 1231   |
| CD14        | CD14 antigen                                                                                                         | 5q22-q32         | 929    |
| CETP        | cholesteryl ester transfer protein, plasma                                                                           | 16q13            | 1071   |
| COL1A1      | collagen, type I, alpha 1                                                                                            | 17q21.3-q22      | 1277   |
| COL1A2      | collagen, type I, alpha 2                                                                                            | 7q21.3-q22.1     | 1278   |
| COL3A1      | collagen, type III, alpha 1 (Ehlers-Danlos syndrome type IV, autosomal dominant)                                     | 2q31-q32.3       | 1281   |
| COL4A1      | collagen, type IV, alpha 1                                                                                           | 13q34            | 1282   |
| COL4A2      | collagen, type IV, alpha 2                                                                                           | 13q34            | 1284   |
| COL4A3      | collagen, type IV, alpha 3 (Goodpasture antigen)                                                                     | 2q36-q37         | 1285   |
| COL4A4      | collagen, type IV, alpha 4                                                                                           | 2q35-q37         | 1286   |
| COL4A5      | collagen, type IV, alpha 5 (Alport syndrome)                                                                         | Xq22             | 1287   |
| COL4A6      | collagen, type IV, alpha 6                                                                                           | Xq22             | 1288   |
| COL5A1      | collagen, type V, alpha 1                                                                                            | 9q34.2-q34.3     | 1289   |
| COL5A2      | collagen, type V, alpha 2                                                                                            | 2q14-q32         | 1290   |
| CRHR1       | corticotropin releasing hormone receptor 1                                                                           | 17q12-q22        | 1394   |
| CRHR2       | corticotropin releasing hormone receptor 2                                                                           | 7p21-p15         | 1395   |
| CSF1        | colony stimulating factor 1 (macrophage)                                                                             | 1p13-p21 or 5q33 | 1435   |
| CSF2        | colony stimulating factor 2 (granulocyte-macrophage)                                                                 | 5q23-q31         | 1437   |
| CSF3        | colony stimulating factor 3 (granulocyte)                                                                            | 17q11.2-q12      | 1440   |
| CSPG2       | chondroitin sulfate proteoglycan 2 (versican)                                                                        | 5q12-q14         | 1462   |
| DAF         | decay accelerating factor for complement (CD55, Cromer blood group system)                                           | 1q32             | 1604   |
| DCN         | Decorin                                                                                                              | 12q23            | 1634   |
| DEFA5       | defensin, alpha 5, Paneth cell-specific                                                                              | 8pter-p21        | 1670   |
| DEFB1       | defensin, beta 1                                                                                                     | 8p23.2-p23.1     | 1672   |
| DLAT        | dihydrolipoamide S-acetyltransferase (E2 component of pyruvate dehydrogenase complex)                                | 11q23.1          | 1737   |
| EDN1        | endothelin 1                                                                                                         | 6p23-p24         | 1906   |
| ELN         | elastin (supravalvular aortic stenosis, Williams-Beuren syndrome)                                                    | 7q11.1-q21.1     | 2006   |
| ESR1        | estrogen receptor 1                                                                                                  | 6q24-q27         | 2099   |
| ESR2        | estrogen receptor 2 (ER beta)                                                                                        | 14q21-q22        | 2100   |

|         |                                                                                                           |               |      |
|---------|-----------------------------------------------------------------------------------------------------------|---------------|------|
| F12     | coagulation factor XII (Hageman factor)                                                                   | 5q33-qter     | 2161 |
| F13A1   | coagulation factor XIII, A1 polypeptide                                                                   | 6p24.2-p23    | 2162 |
| F13B    | coagulation factor XIII, B polypeptide                                                                    | 1q31-q32.1    | 2165 |
| F2      | coagulation factor II (thrombin)                                                                          | 11p11-q12     | 2147 |
| F3      | coagulation factor III (thromboplastin, tissue factor)                                                    | 1p22-p21      | 2152 |
| F5      | coagulation factor V (proaccelerin, labile factor)                                                        | 1q21-q25      | 2153 |
| F7      | coagulation factor VII (serum prothrombin conversion accelerator)                                         | 13q34         | 2155 |
| FABP2   | fatty acid binding protein 2, intestinal                                                                  | 4q28-q31      | 2169 |
| FGB     | fibrinogen, B beta polypeptide                                                                            | 4q28          | 2244 |
| FGF1    | fibroblast growth factor 1 (acidic)                                                                       | 5q31.3-q33.2  | 2246 |
| FGF2    | fibroblast growth factor 2 (basic)                                                                        | 4q26          | 2247 |
| FGF4    | fibroblast growth factor 4 (heparin secretory transforming protein 1, Kaposi sarcoma oncogene)            | 11q13.3       | 2249 |
| FIGF    | c-fos induced growth factor (vascular endothelial growth factor D)                                        | Xp22.31       | 2277 |
| FLT1    | fms-related tyrosine kinase 1 (vascular endothelial growth factor/vascular permeability factor receptor)  | 13q12         | 2321 |
| FLT4    | fms-related tyrosine kinase 4                                                                             | 5q34-q35      | 2324 |
| FN1     | fibronectin 1                                                                                             | 2q34-q36      | 2335 |
| GJA4    | gap junction protein, alpha 4, 37kDa (connexin 37)                                                        | 1p34-p35      | 2701 |
| GJB2    | gap junction protein, beta 2, 26kDa (connexin 26)                                                         | 13q11-q12     | 2706 |
| GNB3    | guanine nucleotide binding protein (G protein), beta polypeptide 3                                        | 12p13         | 2784 |
| GP1BA   | glycoprotein Ib (platelet), alpha polypeptide                                                             | 17pter-p12    | 2811 |
| HLA-E   | major histocompatibility complex, class I, E                                                              | 6p21.3        | 3133 |
| HLA-G   | HLA-G histocompatibility antigen, class I, G                                                              | 6             | 3135 |
| HPGD    | Hydroxyprostaglandin dehydrogenase 15-(NAD)                                                               | 4q34-q35      | 3248 |
| HSPG2   | heparan sulfate proteoglycan 2 (perlecan)                                                                 | 1p36.1-p35    | 3339 |
| HTR2A   | 5-hydroxytryptamine (serotonin) receptor 2A                                                               | 13q14-q21     | 3356 |
| IFNGR1  | interferon gamma receptor 1                                                                               | 6q23-q24      | 3459 |
| IFNGR2  | interferon gamma receptor 2 (interferon gamma transducer 1)                                               | 21q22.1       | 3460 |
| IGF1    | insulin-like growth factor 1 (somatomedin C)                                                              | 12q22-q23     | 3479 |
| IGF2    | insulin-like growth factor 2 (somatomedin A)                                                              | 11p15.5       | 3481 |
| IGF1R   | insulin-like growth factor 1 receptor                                                                     | 15q25-q26     | 3480 |
| IGF2R   | insulin-like growth factor 2 receptor                                                                     | 6q25-q27      | 3482 |
| IL10    | interleukin 10                                                                                            | 1q31-q32      | 3586 |
| IL10RA  | interleukin 10 receptor, alpha                                                                            | 11q23         | 3587 |
| IL12A   | interleukin 12A (natural killer cell stimulatory factor 1, cytotoxic lymphocyte maturation factor 1, p35) | 3p12-q13.2    | 3592 |
| IL12B   | interleukin 12B (natural killer cell stimulatory factor 2, cytotoxic lymphocyte maturation factor 2, p40) | 5q31.1-q33.1  | 3593 |
| IL12RB1 | interleukin 12 receptor, beta 1                                                                           | 19p13.1       | 3594 |
| IL12RB2 | interleukin 12 receptor, beta 2                                                                           | 1p31.3-p31.2  | 3595 |
| IL13RA1 | interleukin 13 receptor, alpha 1                                                                          | Xq24          | 3597 |
| IL13RA2 | interleukin 13 receptor, alpha 2                                                                          | Xq13.1-q28    | 3598 |
| IL18    | interleukin 18 (interferon-gamma-inducing                                                                 | 11q22.2-q22.3 | 3606 |

|          |                                                                          |                 |       |
|----------|--------------------------------------------------------------------------|-----------------|-------|
|          | factor)                                                                  |                 |       |
| IL18BP   | interleukin 18 binding protein                                           | 11q13           | 10068 |
| IL1A     | interleukin 1, alpha                                                     | 2q12-q21        | 3552  |
| IL1B     | interleukin 1, beta                                                      | 2q13-q21        | 3553  |
| IL1R1    | interleukin 1 receptor, type I                                           | 2q12            | 3554  |
| IL1R2    | interleukin 1 receptor, type II                                          | 2q12            | 7850  |
| IL1RAPL1 | interleukin 1 receptor accessory protein-like 1                          | Xp22.1-p21.3    | 11141 |
| IL1RN    | interleukin 1 receptor antagonist                                        | 2q14.2          | 3557  |
| IL2      | interleukin 2                                                            | 4q26-q27        | 3558  |
| IL2RA    | interleukin 2 receptor, alpha                                            | 10p15-p14       | 3559  |
| IL3      | interleukin 3 (colony-stimulating factor, multiple)                      | 5q23-q31        | 3562  |
| IL3RA    | interleukin 3 receptor, alpha (low affinity)                             | Xp22.3;Yp13.3   | 3563  |
| IL4      | interleukin 4                                                            | 5q23-q31        | 3565  |
| IL4R     | interleukin 4 receptor                                                   | 16p11.2-12.1    | 3566  |
| IL5      | interleukin 5 (colony-stimulating factor, eosinophil)                    | 5q23-q31        | 3567  |
| IL5RA    | interleukin 5 receptor, alpha                                            | 3p26-p24        | 3568  |
| IL6      | interleukin 6 (interferon, beta 2)                                       | 7p21-p15        | 3569  |
| IL6R     | interleukin 6 receptor                                                   | 1               | 3570  |
| IL8      | interleukin 8                                                            | 4q13-q21        | 3576  |
| IL8RA    | interleukin 8 receptor, alpha                                            | 2q35            | 3577  |
| IL8RB    | interleukin 8 receptor, beta                                             | 2q35            | 3579  |
| IL9      | interleukin 9                                                            | 5q31-q35        | 3578  |
| IL9R     | interleukin 9 receptor                                                   | Xq28 or Yq12    | 3581  |
| IRS1     | insulin receptor substrate 1                                             | 2q36            | 3667  |
| ITGB3    | integrin, beta 3 (platelet glycoprotein IIIa, antigen CD61)              | 17q21.32        | 3690  |
| LEP      | leptin (obesity homolog, mouse)                                          | 7q31            | 3952  |
| LIPC     | lipase, hepatic                                                          | 15q21-q23       | 3990  |
| LPA      | lipoprotein, Lp(a)                                                       | 6q26-q27        | 4018  |
| LPL      | lipoprotein lipase                                                       | 8p22            | 4023  |
| LTA      | lymphotoxin alpha (TNF superfamily, member 1)                            | 6p21.3          | 4049  |
| LTF      | Lactotransferrin                                                         | 3q21-q23        | 4057  |
| LYZ      | lysozyme (renal amyloidosis)                                             | 12              | 4069  |
| MBL2     | mannose-binding lectin (protein C) 2, soluble (opsonic defect)           | 10q11.2         | 4153  |
| MGP      | matrix Gla protein                                                       | 12p             | 4256  |
| MIF      | macrophage migration inhibitory factor (glycosylation-inhibiting factor) | 22q11.2         | 4282  |
| MMP1     | matrix metalloproteinase 1 (interstitial collagenase)                    | 11q21-q22       | 4312  |
| MMP10    | matrix metalloproteinase 10 (stromelysin 2)                              | 11q22.3         | 4319  |
| MMP11    | matrix metalloproteinase 11 (stromelysin 3)                              | 22q11.2         | 4320  |
| MMP12    | matrix metalloproteinase 12 (macrophage elastase)                        | 11q22.2-11q22.3 | 4321  |
| MMP13    | matrix metalloproteinase 13 (collagenase 3)                              | 11q22.3         | 4322  |
| MMP14    | matrix metalloproteinase 14 (membrane-inserted)                          | 14q11-q12       | 4323  |
| MMP15    | matrix metalloproteinase 15 (membrane-inserted)                          | 16q13-16q21     | 4324  |
| MMP16    | matrix metalloproteinase 16 (membrane-inserted)                          | 8q21-8q22.1     | 4325  |
| MMP17    | matrix metalloproteinase 17 (membrane-inserted)                          | 12q24.3         | 4326  |

|          |                                                                                                 |                 |       |
|----------|-------------------------------------------------------------------------------------------------|-----------------|-------|
| MMP19    | matrix metalloproteinase 19                                                                     | 12q14           | 4327  |
| MMP2     | matrix metalloproteinase 2 (gelatinase A, 72kDa gelatinase, 72kDa type IV collagenase)          | 16q13-q21       | 4313  |
| MMP3     | matrix metalloproteinase 3 (stromelysin 1, progelatinase)                                       | 11q22.3         | 4314  |
| MMP7     | matrix metalloproteinase 7 (matrilysin, uterine)                                                | 11q21-q22       | 4316  |
| MMP8     | matrix metalloproteinase 8 (neutrophil collagenase)                                             | 11q21-q22       | 4317  |
| MMP9     | matrix metalloproteinase 9 (gelatinase B, 92kDa gelatinase, 92kDa type IV collagenase)          | 20q12-q13       | 4318  |
| MTHFR    | 5,10-methylenetetrahydrofolate reductase (NADPH)                                                | 1p36.3          | 4524  |
| NFKB1    | nuclear factor of kappa light polypeptide gene enhancer in B-cells 1 (p105)                     | 4q24            | 4790  |
| NOS2A    | nitric oxide synthase 2A (inducible, hepatocytes)                                               | 17q11.2-q12     | 4843  |
| NOS3     | nitric oxide synthase 3 (endothelial cell)                                                      | 7q35-q36        | 4846  |
| NPPA     | natriuretic peptide precursor A                                                                 | 1p36            | 4878  |
| NPR1     | natriuretic peptide receptor A/guanylate cyclase A (atrionatriuretic peptide receptor A)        | 1q21-q22        | 4881  |
| NPY      | neuropeptide Y                                                                                  | 7pter-q22       | 4852  |
| OXTR     | oxytocin receptor                                                                               | 3p25            | 5021  |
| PAFAH1B1 | platelet-activating factor acetylhydrolase, isoform Ib, alpha subunit 45 kDa                    | 17p13.3-17p13.3 | 5048  |
| PDGFB    | platelet-derived growth factor beta polypeptide (simian sarcoma viral (v-sis) oncogene homolog) | 22q12.3-q13.1   | 5155  |
| PDGFC    | platelet derived growth factor C                                                                | 4q32            | 56034 |
| PECAM1   | platelet/endothelial cell adhesion molecule (CD31 antigen)                                      | 17q23           | 5175  |
| PGF      | placental growth factor, vascular endothelial growth factor-related protein                     | 14q22-q24.3     | 5228  |
| PIGF     | phosphatidylinositol glycan, class F                                                            | 2p21-p16        | 5281  |
|          |                                                                                                 |                 |       |
| PLAT     | plasminogen activator, tissue                                                                   | 8p12-q11.2      | 5327  |
| PLAU     | plasminogen activator, urokinase                                                                | 10q24-qter      | 5328  |
| PLAUR    | plasminogen activator, urokinase receptor                                                       | 19q13           | 5329  |
| PON1     | paraoxonase 1                                                                                   | 7q21-q22        | 5444  |
| PPARA    | peroxisome proliferative activated receptor, alpha                                              | 22q12-q13.1     | 5465  |
| PPARG    | peroxisome proliferative activated receptor, gamma                                              | 3p25            | 5468  |
| PROC     | protein C (inactivator of coagulation factors Va and VIIIa)                                     | 2q13-q21        | 5624  |
| PROS1    | protein S (alpha)                                                                               | 3p11-q11.2      | 5627  |
| PTGER1   | prostaglandin E receptor 1 (subtype EP1), 42 kDa                                                | 19p13.1         | 5731  |
| PTGER2   | prostaglandin E receptor 2 (subtype EP2), 53 kDa                                                | reserved        | 5732  |
| PTGER3   | prostaglandin E receptor 3 (subtype EP3)                                                        | 1p31.2          | 5733  |
| PTGER4   | prostaglandin E receptor 4 (subtype EP4)                                                        | 5p13.1          | 5734  |
| PTGS1    | prostaglandin-endoperoxide synthase 1 (prostaglandin G/H synthase and cyclooxygenase)           | 9q32-q33.3      | 5742  |
| PTGS2    | prostaglandin-endoperoxide synthase 2                                                           | 1q25.2-q25.3    | 5743  |

|          |                                                                                                                 |               |       |
|----------|-----------------------------------------------------------------------------------------------------------------|---------------|-------|
|          | (prostaglandin G/H synthase and cyclooxygenase)                                                                 |               |       |
| REN      | Renin                                                                                                           | 1q32          | 5972  |
| SELE     | selectin E (endothelial adhesion molecule 1)                                                                    | 1q22-q25      | 6401  |
| SELP     | selectin P (granule membrane protein 140kDa, antigen CD62)                                                      | 1q22-q25      | 6403  |
| SERPINC1 | serine (or cysteine) proteinase inhibitor, clade C (antithrombin), member 1                                     | 1q23-q25.1    | 462   |
| SERPINE1 | serine (or cysteine) proteinase inhibitor, clade E (nexin, plasminogen activator inhibitor type 1), member 1    | 7q21.3-q22    | 5054  |
| SOD3     | superoxide dismutase 3, extracellular                                                                           | 4pter-q21     | 6649  |
| SPARC    | secreted protein, acidic, cysteine-rich (osteonectin)                                                           | 5q31-q33      | 6678  |
| TAP1     | transporter 1, ATP-binding cassette, sub-family B (MDR/TAP)                                                     | 6p21.3        | 6890  |
| TBXAS1   | thromboxane A synthase 1 (platelet, cytochrome P450, family 5, subfamily A)                                     | 7q34-q35      | 6916  |
| TGFB1    | transforming growth factor, beta 1 (Camurati-Engelmann disease)                                                 | 19q13.1       | 7040  |
| THBD     | Thrombomodulin                                                                                                  | 20p12-cen     | 7056  |
| THBS1    | thrombospondin 1                                                                                                | 15q15         | 7057  |
| THBS4    | thrombospondin 4                                                                                                | 5q12-5q13     | 7060  |
| THPO     | thrombopoietin (myeloproliferative leukemia virus oncogene ligand, megakaryocyte growth and development factor) | 3q27          | 7066  |
| TIMP1    | TIMP metalloproteinase inhibitor 1                                                                              | Xp11.3-p11.23 | 7076  |
| TIMP2    | tissue inhibitor of metalloproteinase 2                                                                         | 17q25         | 7077  |
| TLR1     | toll-like receptor 1                                                                                            | 4p14          | 7096  |
| TLR2     | toll-like receptor 2                                                                                            | 4q32          | 7097  |
| TLR3     | toll-like receptor 3                                                                                            | 4q35          | 7098  |
| TLR4     | toll-like receptor 4                                                                                            | 9q32-33       | 7099  |
| TLR5     | toll-like receptor 5                                                                                            | 1q32.3-q42    | 7100  |
| TLR6     | toll-like receptor 6                                                                                            | 4p16.1        | 10333 |
| TLR9     | toll-like receptor 9                                                                                            |               |       |
| TNF      | tumor necrosis factor (TNF superfamily, member 2)                                                               | 6p21.3        | 7124  |
| TNFRSF1A | tumor necrosis factor receptor superfamily, member 1A                                                           | 12p13.2       | 7132  |
| TNFRSF1B | tumor necrosis factor receptor superfamily, member 1B                                                           | 1p36-p32      | 7133  |
| TNR      | tenascin R (restrictin, janusin)                                                                                | 1q25-q31      | 7143  |
| VEGF     | vascular endothelial growth factor                                                                              | 6p21-p12      | 7422  |
| VEGFB    | vascular endothelial growth factor B                                                                            | 11q13         | 7423  |
| VEGFC    | vascular endothelial growth factor C                                                                            | 4q33-4q34     | 7424  |
| VWF      | von Willebrand factor                                                                                           | 12p13.3-p13.2 | 7450  |

**Supplemental Table 2.** Summary on previously reported genetic association studies on PE

| Pubmed ID or Author | Phenotype              | Cases (N) | Controls (N) | Ethnic Group         | HUGO symbol | Polymorphism       | MAF       | P-value         | Odds Ratio | 95% CI      |
|---------------------|------------------------|-----------|--------------|----------------------|-------------|--------------------|-----------|-----------------|------------|-------------|
| 14967168            | PE                     | 95        | 89           | Turkish              | ACE         | INDEL <sup>g</sup> | 0.56      | <0.05           | 1.53       | 1.02, 2.34  |
| 14638622            | PE                     | 180       | 310          | French Canadian      | ACE         | IVS-16 INDEL       |           | 0.78            | 1          | 0.8, 1.4    |
| 12932862            | PE                     | 41        | 102          | Greek                | ACE         | INDEL              |           | NS <sup>e</sup> |            |             |
| 15082899            | PE                     | 90        | 98           | Korean               | ACE         | INDEL              |           | <0.05           |            |             |
| 11776341            | PE                     | 133       | 224          | Japanese             | ACE         | NSG INDEL          |           | NS              |            |             |
| 11776341            | PE                     | 133       | 224          | Japanese             | ADD1        | G460W              |           | NS              |            |             |
| 11776341            | PE                     | 133       | 224          | Japanese             | ADRB2       | Q27E               |           |                 |            |             |
| 11776341            | PE                     | 133       | 224          | Japanese             | ADRB2       | R16G               |           | NS              |            |             |
| 11776341            | PE                     | 133       | 224          | Japanese             | ADRB3       | WGYR               |           |                 |            |             |
| 15042014            | PE                     | 177       | 179          | USA                  | ADBR3       | W64R               | 0.91      | NS              |            |             |
| 10586529            | HT <sup>a</sup>        | 33        | 280          | Japanese             | AGT         | M235T              |           | NS              |            |             |
| 8513325             | PE                     |           |              | Caucasian & Japanese | AGT         | M235T              |           |                 |            |             |
| 10426644            | PE                     | 43        | 84           | British              | AGT         | M235T              |           | NS              |            |             |
| 10426644            | PE                     | 43        | 84           | British              | AGT         | STRP               |           | 0.02            |            |             |
| 10694185            | PE                     | 32        |              | Mixed, USA           | AGT         | L10F               |           |                 |            |             |
| 10694185            | PE                     | 32        |              | Mixed, USA           | AGT         | M235T              | 0.60-0.83 | 0.23            |            |             |
| 12576245            | PE + IUGR <sup>b</sup> | 60        | 400          | USA                  | AGT         | M235T              | 0.64      | <0.001          |            |             |
| [130]               | PE                     | 213       | 161          | Korean               | AGT         | A/G-6              |           | NS              |            |             |
| 14638622            | PE                     | 180       | 310          | French Canadian      | AGT         | T174M              | 0.92      | 0.0033          | 1.9        | 1.2, 2.9    |
| 14638622            | PE                     | 180       | 310          | French Canadian      | AGT         | M235T              | 0.6       | 0.19            | 1.2        | 0.9, 1.6    |
| 12932862            | PE                     | 41        | 102          | Greek                | AGT         | M235T              |           | 0.02            | 7.92       | 2.17, 28.87 |
| 15082899            | PE                     | 90        | 98           | Korean               | AGT         | M235T              | 0.79      | NS              |            |             |
| 15082899            | PE                     | 90        | 98           | Korean               | AGT         | T174M              | 0.93      | NS              |            |             |
| 10482871            | HT                     | 89        | 381          | Japanese             | AGT         | M235T              | 0.75      | <0.001          |            |             |
| 12417054            | PE                     | 14        | 6            | Romanian             | AGT         | M235T              |           |                 |            |             |
| 7590609             | HT                     | 139       | 278          | Japanese             | AGT         | M235T              |           | <0.001          |            |             |
| 7775818             | HT                     | 82        | 180          | Japanese             | AGT         | M235T              |           | <0.01           |            |             |
| 11776341            | PE                     | 133       | 224          | Japanese             | AGT         | G/A-6              |           | NS              |            |             |
| **15889386          | PE                     | 627       |              | British              | AGT         | C11535A            |           | .583            |            |             |
| **15889386          | PE                     | 627       |              | British              | AGT         | C172T              |           | .392            |            |             |
| **15889386          | PE                     | 627       |              | British              | AGT         | C6066A             |           | .625            |            |             |
| **15889386          | PE                     | 627       |              | British              | AGT         | G1035A             |           | .997            |            |             |
| **15889386          | PE                     | 627       |              | British              | AGT         | G676A              |           | .913            |            |             |
| **15889386          | PE                     | 627       |              | British              | AGT         | M235T              |           | .505            |            |             |
| **15889386          | PE                     | 627       |              | British              | AGT         | T174M              |           | .185            |            |             |
| **15889386          | PE                     | 627       |              | British              | AGT         | G/T-1074           |           | .815            |            |             |
| 15294367            | PE                     | 104       | 114          | Korean               | AGT         | M235T              |           |                 |            |             |

|            |                 |     |     |                 |                        |                 |      |                 |      |            |
|------------|-----------------|-----|-----|-----------------|------------------------|-----------------|------|-----------------|------|------------|
| 14638622   | PE              | 180 | 310 | French Canadian | AGTR1                  | A1166C          | 0.67 | 0.53            | 0.9  | 0.7, 1.2   |
| 12932862   | PE              | 41  | 102 | Greek           | AGTR1                  | A1166C          |      | NS              |      |            |
| 15221785   | PE              | 98  | 118 | British         | AGTR1                  | Haplotype       |      | 0.3             |      |            |
| 11776341   | PE              | 133 | 224 | Japanese        | AGTR1                  | A1166C          |      | NS              |      |            |
| **15889386 | PE              | 627 |     | British         | AGTR1                  | A1166C          |      | 0.957           |      |            |
| **15889386 | PE              | 627 |     | British         | AGTR1                  | C573T           |      | 0.848           |      |            |
| **15889386 | PE              | 627 |     | British         | AGTR1                  | T/A-810         |      | 0.41            |      |            |
| **15889386 | PE              | 627 |     | British         | AGTR1                  | C/T-521         |      | 0.309           |      |            |
| **15889386 | PE              | 627 |     | British         | AGTR2                  | A333T           |      | 0.039           |      |            |
| **15889386 | PE              | 627 |     | British         | AGTR2                  | G2812T          |      | 0.054           |      |            |
| **15889386 | PE              | 627 |     | British         | AGTR2                  | Haplotype       |      | 0.59            |      |            |
| 15221785   | PE              | 98  | 118 | British         | AGTR2                  | Haplotype       |      | 0.004           | 2.52 | 0.97, 6.55 |
| 10862840   | PE              | 63  | 126 | Israeli         | Anti-thrombin-III def. |                 |      | NA <sup>f</sup> | NA   | NA         |
| 14638622   | PE              | 180 | 310 | French Canadian | APOB                   | T2488T          | 0.5  | 0.87            | 1    | 0.8, 1.3   |
| 146787732  | PE              | 51  | 144 | Portugese       | APOE                   | E2/E3/E4        |      | NS              |      |            |
| 12175441   | PE              | 49  | 55  | French          | APOE                   | E2/E3/E4        | 0.76 | NS              |      |            |
| 11776341   | PE              | 133 | 224 | Japanese        | APOE                   | E2/E3/E4        |      | NS              |      |            |
| 15925890   | PE              |     |     | Chinese         | APOJ                   | C1061T          | 0.83 | NS              |      |            |
| 15042014   | PE              | 177 | 179 | USA             | B3AR                   | T64R            | 0.91 | NS              |      |            |
| 11349190   | PE              | 281 | 360 | USA Caucasian   | CBS                    | 68 bp insertion | 0.91 | NS              |      |            |
| 15866085   | PE              | 43  | 122 | Spanish         | CBS                    | C699T           | 0.69 | NS              |      |            |
| 15866085   | PE              | 43  | 122 | Spanish         | CBS                    | 844INS68        | 0.86 | NS              |      |            |
| 15866085   | PE              | 43  | 122 | Spanish         | CBS                    | C1080T          | 0.7  | NS              |      |            |
| 146787732  | PE              | 51  | 144 | Portugese       | CETP                   | IVS1            |      | NS              |      |            |
| 11776341   | PE              | 133 | 224 | Japanese        | CYP11B2                | T/C-344         |      | NS              |      |            |
| 15734083   | PE              | 121 | 214 | Korean          | CYP1A1                 | MspI            | 0.6  | NS              |      |            |
| 15734083   | PE              | 121 | 214 | Korean          | CYP1A1                 | I/V             | 0.73 | NS              |      |            |
| 11593097   | PE              | 72  | 81  | Australian      | EDN1                   | L198N           | 0.77 | NS              |      |            |
| 11776341   | PE              | 133 | 224 | Japanese        | EDN1                   | K198N           |      | NS              |      |            |
| 12173035   | PE              | 133 | 115 | Finnish         | EPHX1                  | Haplotype       | 0.66 | 0.01            | 1.61 | 1.2, 2.32  |
| 11283205   | PE              | 183 | 151 | Dutch           | EPHX1                  | Y113H           |      |                 | 2    | 1.2, 3.7   |
| 11283205   | PE              | 183 | 151 | Dutch           | EPHX1                  | R139H           |      | NS              |      |            |
| 10521764   | PE              | 163 | 163 | Dutch           | F2                     | G20210A         | 0.96 | NS              |      |            |
| 10862840   | PE              | 63  | 126 | Israeli         | F2                     | G20210A         |      | 0.14            | 2.6  | 0.7, 10.2  |
| 14508198   | HT <sup>a</sup> | 59  |     | Italian         | F2                     | G20210A         |      | NS              |      |            |
| 11961379   | PE              | 58  | 74  | Italian         | F2                     | G20210A         |      | NS              |      |            |
| 15091001   | PE              | 37  | 100 | British         | F2                     | G20210A         | 0.98 | NS              |      |            |
| 12628278   | PE              | 100 | 110 | South-African   | F2                     | G20210A         | 1    |                 |      |            |
| 12867763   | PE              | 52  | 80  | Italian         | F2                     | G20210A         |      | NS              |      |            |
| 11483920   | PE              | 110 | 97  | Mixed           | F2                     | G20210A         | 0.98 | 0.92            |      |            |
| 11776341   | PE              | 133 | 224 | Japanese        | F2                     | G10210A         | 1    |                 |      |            |
| 15733879   | PE              | 39  | 64  | Italian         | F2                     | G20210A         |      | NS              |      |            |
| 10521764   | PE              | 163 | 163 | Dutch           | F5                     | G1691A          | 0.9  | NS              |      |            |

|             |                    |     |     |                         |       |             |      |       |      |            |
|-------------|--------------------|-----|-----|-------------------------|-------|-------------|------|-------|------|------------|
| 10329869    | PE                 | 345 | 67  | Dutch                   | F5    | G1691A      | 0.98 | NS    |      |            |
| 10862840    | PE                 | 63  | 126 | Israeli                 | F5    | G1691A      |      | 0     | 4.6  | 1.8, 11.6  |
| 14638622    | PE                 | 180 | 310 | French Canadian         | F5    | G1691A      |      | 0.35  | 1.6  | 0.6, 4.2   |
| 14508198    | HT <sup>a</sup>    | 59  |     | Italian                 | F5    |             |      | NS    |      |            |
| 11961379    | PE                 | 58  | 74  | Italian                 | F5    |             |      | NS    |      |            |
| 11950065    | PE                 | 133 | 224 | Japanese                | F5    | M385T       |      | 0.05  |      |            |
| 11950065    | PE                 | 133 | 224 | Japanese                | F5    | R485K       |      | 0.02  |      |            |
| 11950065    | PE                 | 133 | 224 | Japanese                | F5    | N789T       |      | 0.3   |      |            |
| 11950065    | PE                 | 133 | 224 | Japanese                | F5    | S1285S      |      | 0.86  |      |            |
| 11950065    | PE                 | 133 | 224 | Japanese                | F5    | L1302I      |      | 0.64  |      |            |
| 15091001    | PE                 | 37  | 100 | British                 | F5    | G1691A      | 0.98 | 0.048 |      |            |
| 12628278    | PE                 | 100 | 110 | South-African           | F5    | G1691A      | 1    |       |      |            |
| 11888101    | PE                 | 48  | 46  | Australian              | F5    | G2691A      | 0.87 | 0.52  |      |            |
| 12867763    | PE                 | 52  | 80  | Italian                 | F5    | G1691A      |      | NS    |      |            |
| 9241730     | PE                 | 96  | 129 | Italian                 | F5    | G1691A      | 0.98 | 0.02  |      |            |
| 11349190    | PE                 | 281 | 360 | USA Caucasian           | F5    | G1691A      | 0.98 | NS    |      |            |
| 10625207    | HT <sup>a</sup>    | 71  | 109 | Japanese                | F5    | G1691A      | 1    |       |      |            |
| 11483920    | PE                 | 110 | 97  | USA                     | F5    | G1691A      | 0.99 | 0.96  |      |            |
| 10373212    | PE                 | 283 | 200 | British                 | F5    | G1691A      | 0.97 | NS    |      |            |
| * 14746952  | PE                 | 82  | 116 | Germans and Croats only | F5    | G1691A      | 0.99 | 0.05  |      |            |
| ** 15097012 | PE                 | 92  |     | Norwegian               | F5    | G1691A      |      |       | 2.5  | 1.1, 5.7   |
| 11776341    | PE                 | 133 | 224 | Japanese                | F5    | R3086       | 1    |       |      |            |
| 11776341    | PE                 | 133 | 224 | Japanese                | F5    | R308T       | 1    |       |      |            |
| 11776341    | PE                 | 133 | 224 | Japanese                | F5    | R485K       | 0.67 | 0.007 | 1.36 | 1.09, 1.69 |
| 11776341    | PE                 | 133 | 224 | Japanese                | F5    | G1691A      | 1    |       |      |            |
| 15905108    | PE/ E <sup>d</sup> | 33  | 62  | Mexican                 | F5    | G1691A      | 0.98 | NS    |      |            |
| 15733879    | PE                 | 39  | 64  | Italian                 | F5    | G1691A      |      | <0.05 |      |            |
| ** 15889386 | PE                 | 627 |     | British                 | F5    | G1691A      |      | 0.779 |      |            |
| 12151156    | PE                 | 133 | 115 | Finnish                 | F7    | INDEL-323   | 0.94 | NS    |      |            |
| 12151156    | PE                 | 133 | 115 | Finnish                 | FGB   | G/A-455     | 0.79 | NS    |      |            |
| 15091001    | PE                 | 37  | 100 | British                 | FGB   | G/A-455     | 0.82 | 0.572 |      |            |
| 11776341    | PE                 | 133 | 224 | Japanese                | FOLHI | H475Y       | 1    |       |      |            |
| 11776341    | PE                 | 133 | 224 | Japanese                | GCGR  | G40S        | 1    |       |      |            |
| 11776341    | PE                 | 133 | 224 | Japanese                | GCK   | G/A-258     |      | NS    |      |            |
| 11776341    | PE                 | 133 | 224 | Japanese                | GNB3  | C825T       |      | NS    |      |            |
| 11776341    | PE                 | 133 | 224 | Japanese                | GP1BA | T145M       |      | NS    |      |            |
| 10862841    | HELLP <sup>c</sup> | 170 | 108 | Caucasian               | GST   | P1b-1b      |      | 0.02  | 6    | 1.2, 10    |
| 15734083    | PE                 | 121 | 214 | Korean                  | GSTM1 | Null allele | 0.52 | NS    |      |            |
| 14638622    | PE                 | 180 | 310 | French Canadian         | GSTP1 | I105V       |      | 0.26  | 0.7  | 0.4, 1.3   |
| 14719182    | HT <sup>a</sup>    | 131 | 327 | Japanese                | GSTP1 | I105V       |      |       |      |            |
| 11776341    | PE                 | 133 | 224 | Japanese                | GSTP1 | I105V       |      | NS    |      |            |
| ** 11826024 | PE                 | 113 |     | Dutch                   | GSTP1 | I105V       |      | 0.005 |      |            |
| 15734083    | PE                 | 121 | 214 | Korean                  | GSTT1 | Null allele | 0.55 | NS    |      |            |



|             |                    |     |     |                               |         |                      |      |       |      |             |
|-------------|--------------------|-----|-----|-------------------------------|---------|----------------------|------|-------|------|-------------|
| 2371715     | PE                 | 92  | 65  |                               | HLA-A   |                      |      | NS    |      |             |
| 8150376     | PE                 | 183 | 151 | Swedish                       | HLA-A   |                      |      | NS    |      |             |
| 2371715     | PE                 | 92  | 65  |                               | HLA-B   |                      |      |       |      |             |
| 8150376     | PE                 | 183 | 151 | Swedish                       | HLA-B   |                      |      |       |      |             |
| 2371715     | PE                 | 92  | 65  |                               | HLA-DR  |                      |      | 0.005 | 3.1  |             |
| 8150376     | PE                 | 48  | 26  | Swedish                       | HLA-DR  |                      |      |       |      |             |
| 2572795     | PE                 | 56  | 71  |                               | HLA-DR  | HLA-DR4              |      |       |      |             |
| ** 14985477 | PE                 | 155 |     | Danish                        | HLA-G   |                      |      | 0.002 | 5.57 | 1.79, 17.31 |
| ** 10816131 | PE                 | 68  |     | Irish                         | HLA-G   |                      |      | NS    |      |             |
| 11776341    | PE                 | 133 | 224 | Japanese                      | HLA-G   | exon 8 INDEL         |      | NS    |      |             |
| 12624142    | HELLP <sup>c</sup> | 109 | 166 | Dutch                         | HP      |                      | 0.57 | NS    |      |             |
| 11776341    | PE                 | 133 | 224 | Japanese                      | ICAM1   | K469E                |      | NS    |      |             |
| ** 10816131 | PE                 | 68  |     | Irish                         | IGF2    |                      | 0.58 | NS    |      |             |
| 16021081    | PE                 | 150 | 661 | USA                           | IL10    | A/G-1082             |      |       | 0.9  | 0.2, 4.7    |
| 16021081    | PE                 | 150 | 661 | USA                           | IL10    | C/T-819              |      |       | 0.3  | 0.04, 3.0   |
| 15085177    | PE                 |     |     |                               | IL10    | -2849                |      |       | 0.29 | 0.10, 0.83  |
| 16021081    | PE                 | 150 | 661 | USA                           | IL1A    | G/T-4845             |      |       | 11.6 | 1.5, 89.3   |
| 16021081    | PE                 | 150 | 661 | USA                           | IL1A    | C/T-889              |      | .035  | 5.1  | 0.6, 41.6   |
| 16021081    | PE                 | 150 | 661 | USA                           | IL1B    | C/T-3957             |      |       | 0.5  | 0.1, 5.2    |
| 11339912    | PE                 | 69  | 47  | Hispanic,<br>USA              | IL1B    | C/T-511              |      | NS    |      |             |
| 11339912    | PE                 | 69  | 47  | Hispanic,<br>USA              | IL1B    | exon 5               |      | NS    |      |             |
| 12044341    | PE                 | 150 | 104 | Dutch                         | IL1B    | Taq1                 | 0.76 | NS    |      |             |
| 12044341    | PE                 | 150 | 104 | Dutch                         | IL1B    | Ava1                 | 0.68 | NS    |      |             |
| 11339912    | PE                 | 69  | 47  | Hispanic,<br>USA              | IL-1RN  | IVS2 86-bp<br>repeat |      | NS    |      |             |
| 12044341    | PE                 | 150 | 104 | Dutch                         | IL1RN   | IVS2 86-bp<br>repeat | 0.68 | NS    |      |             |
| 14568678    | PE                 | 133 | 400 | Finish                        | IL1RN   | IVS2 86-bp<br>repeat | 0.67 | 0.006 | 1.51 |             |
| 12716314    | PE                 | 115 | 217 | South-African<br>Black (Zulu) | ITGB3   | C/T                  | 0.86 | NS    |      |             |
| 11754000    | PE                 | 45  | 48  | Australian                    | KIR2DL4 |                      |      | NS    |      |             |
| 10636447    | PE                 | 100 | 211 | USA<br>Caucasian              | LPL     | N291S                | 0.99 | 0.008 |      |             |
| 10636447    | PE                 | 100 | 211 | USA<br>Caucasian              | LPL     | D9N                  | 0.99 | 0.02  |      |             |
| 10636447    | PE                 | 100 | 211 | USA<br>Caucasian              | LPL     | T/G-93               | 0.99 | 0.02  |      |             |
| 10636447    | PE                 | 100 | 211 | USA<br>Caucasian              | LPL     | S447X                | 0.91 | NS    |      |             |
| * 11711487  | PE                 | 350 | 265 | USA<br>Caucasian              | LPL     | D9N                  | 0.98 | NS    |      |             |
| * 11711487  | PE                 | 350 | 265 | USA<br>Caucasian              | LPL     | T/G-93               | 0.97 | NS    |      |             |
| * 11711487  | PE                 | 350 | 265 | USA<br>Caucasian              | LPL     | N291S                | 0.99 | NS    |      |             |

|             |                   |     |         |                                |       |              |      |       |     |          |
|-------------|-------------------|-----|---------|--------------------------------|-------|--------------|------|-------|-----|----------|
| 11776341    | PE                | 133 | 224     | Japanese                       | LPL   | T/G-93       | 1    |       |     |          |
| 11576577    | PE                | 30  | 98      | Dutch                          | LTA   | NCOI         |      | NS    |     |          |
| 11576577    | PE                | 30  | 98      | Dutch                          | LTA   | ASpHI        |      | NS    |     |          |
| 15734083    | PE                | 121 | 214     | Korean                         | MPO   | G/A-463      | 0.92 | NS    |     |          |
| 10862840    | PE                | 63  | 126     | Israeli                        | MTHFR | C677T        |      | 0     | 3   | 1.3, 6.8 |
| 11531629    | PE                | 46  |         | Danish                         | MTHFR | C677T        | 0.71 | <0.55 |     |          |
| 12681883    | PE                | 27  | 30      | USA                            | MTHFR | C677T        |      | NS    |     |          |
| 14638622    | PE                | 180 | 310     | French<br>Canadian             | MTHFR | A222V        |      | 0.31  | 1.3 | 0.8, 2.2 |
| 14508198    | HT <sup>a</sup>   | 59  |         | Italian                        | MTHFR | C677T        |      | NS    |     |          |
| 11961379    | PE                | 58  | 74      | Italian                        | MTHFR | C677T        |      | NS    |     |          |
| 15091001    | PE                | 37  | 100     | British                        | MTHFR | C677T        | 0.69 | NS    |     |          |
| 12867763    | PE                | 52  | 80      | Italian                        | MTHFR | C677T        |      | NS    |     |          |
| 9241730     | PE                | 96  | 129     | Italian                        | MTHFR | C677T        | 0.81 | 0.05  |     |          |
| 11349190    | PE                | 281 | 360     | USA<br>Caucasian               | MTHFR | C677T        | 0.68 | NS    |     |          |
| 11483920    | PE                | 110 | 97      |                                | MTHFR | C677T        | 0.76 | 0.54  |     |          |
| 10373212    | PE                | 283 | 200     | British                        | MTHFR | C677T        | 0.69 | NS    |     |          |
| * 14746952  | PE                | 82  | 116     | Germans and<br>Croatsians only | MTHFR | C677T        |      | NS    |     |          |
| ** 15097012 | PE                | 92  |         | Norwegian                      | MTHFR | C677T        |      |       | 2   | 1.0, 4.1 |
| 15163465    | PE                | 148 | 177+313 | Hispanic                       | MTHFR | C677T        | 0.55 | NS    |     |          |
| * 12052604  | PE                | 40  | 72      | German-<br>Croatian            | MTHFR | C677T        |      | 0.507 |     |          |
| * 12052604  | PE                | 41  | 27      | Indonesian                     | MTHFR | C677T        |      | 0.902 |     |          |
| 10655155    | PE                | 171 | 185     | Zimbabwean<br>(Black)          | MTHFR | C677T        | 0.91 | NS    |     |          |
| 11096266    | PE                | 156 | 79      | Australian                     | MTHFR | C677T        | 0.67 | NS    |     |          |
| 10965192    | PE                |     |         | Australian                     | MTHFR | A1298C       |      | NS    |     |          |
| 11776341    | PE                | 133 | 224     | Japanese                       | MTHFR | C677T        | 0.63 |       |     |          |
| 11776341    | PE                | 133 | 224     | Japanese                       | MTHFR | A1298C       |      | NS    |     |          |
| 15866085    | PE                | 43  | 122     | Spanish                        | MTHFR | C677T        | 0.54 | NS    |     |          |
| 15866085    | PE                | 43  | 122     | Spanish                        | MTHFR | A1298C       | 0.74 | NS    |     |          |
| 15905108    | PE/E <sup>d</sup> | 33  | 62      | Mexican                        | MTHFR | C677T        | 0.6  | NS    |     |          |
| 15733879    | PE                | 39  | 64      | Italian                        | MTHFR | C677T        |      | NS    |     |          |
| ** 15889386 | PE                | 627 |         | British                        | MTHFR | A1298C       |      | 0.419 |     |          |
| ** 15889386 | PE                | 627 |         | British                        | MTHFR | C677T        |      | 0.723 |     |          |
| 15866085    | PE                | 43  | 122     | Spanish                        | MTR   | A2756G       | 0.85 | NS    |     |          |
| 15866085    | PE                | 43  | 122     | Spanish                        | MTRR  | G66A         | 0.5  | NS    |     |          |
| 15866085    | PE                | 43  | 122     | Spanish                        | MTRR  | G/A IVSI+766 | 0.53 | NS    |     |          |
| 15866085    | PE                | 43  | 122     | Spanish                        | MTRR  | A/C IVSI+754 | 0.73 | NS    |     |          |
| 12908999    | PE                | 61  | 188     | Italian                        | NOS3  | VNTR         | 0.82 | NS    |     |          |
| 12699878    | PE                | 132 | 113     | Finnish                        | NOS3  | Q298D        | 0.68 | NS    |     |          |
| 14719182    | HT <sup>a</sup>   | 131 | 327     | Japanese                       | NOS3  | Q298D        |      |       |     |          |
| 10647900    | PE                | 72  | 48      | Chinese                        | NOS3  | CA-repeat    |      | 0.27  |     |          |
| 10647900    | PE                | 46  | 80      | Australian                     | NOS3  | CA-repeat    |      | 0.2   |     |          |
| 11745998    | HT <sup>a</sup>   | 152 | 335     | Japanese                       | NOS3  | Q298D        |      | <0.01 |     |          |

|            |                 |     |           |                            |          |                     |      |       |           |          |
|------------|-----------------|-----|-----------|----------------------------|----------|---------------------|------|-------|-----------|----------|
| 15110896   | PE              | 64  | 397       | Hispanic & Caucasian       | NOS3     | Q298D               | 0.79 | NS    |           |          |
| 12867761   | PE              | 112 | 119       | Bangladesian               | NOS3     | Q298D               |      | NS    |           |          |
| 11776341   | PE              | 133 | 224       | Japanese                   | NOS3     | Q298D               |      | NS    |           |          |
| 11776341   | PE              | 133 | 224       | Japanese                   | NOS3     | T/C-786             |      | NS    |           |          |
| 16009421   | PE              |     |           | Korean                     | NOS3     | Q298D               |      | NS    |           |          |
| **15889386 | PE              | 627 |           | British                    | NOS3     | A17971A             |      | 0.22  |           |          |
| **15889386 | PE              | 627 |           | British                    | NOS3     | C13834A             |      | 0.676 |           |          |
| **15889386 | PE              | 627 |           | British                    | NOS3     | G3497A              |      | 0.355 |           |          |
| **15889386 | PE              | 627 |           | British                    | NOS3     | G9932A              |      | 0.724 |           |          |
| **15889386 | PE              | 627 |           | British                    | NOS3     | Q298D               |      | 0.455 |           |          |
| **15889386 | PE              | 627 |           | British                    | NOS3     | T/A-1474            |      | 0.248 |           |          |
| 11776341   | PE              | 133 | 224       | Japanese                   | PLA2G7   | V279F               |      | NS    |           |          |
| 12324185   | PE              | 133 | 115       | Finnish                    | PPARA    | P12A                | 0.81 | NS    |           |          |
| 10521764   | PE              | 163 | 163       | Dutch                      | PROC     |                     |      | NS    |           |          |
| 10862840   | PE              | 63  | 126       | Israeli                    | PROC     |                     | 1    | NA    | NA        | NA       |
| 10521764   | PE              | 163 | 163       | Dutch                      | PROS1    |                     |      | NS    |           |          |
| 10862840   | PE              | 63  | 126       | Israeli                    | PROS1    |                     | 0    | 10.7  | 1.2, 94.3 |          |
| 11776341   | PE              | 133 | 224       | Japanese                   | SELE     | S128R               |      |       |           |          |
| 14508198   | HT <sup>a</sup> | 59  |           | Italian                    | SERPINE1 | 4G/5G               |      | NS    |           |          |
| 12867763   | PE              | 52  | 80        | Italian                    | SERPINE1 | 4G/56-675           |      | 0.014 |           |          |
| 12716314   | PE              | 115 | 217       | South-African Black (Zulu) | SERPINE1 | 4G/5G               | 0.88 | NS    |           |          |
| 10807538   | PE              | 115 | 210 & 298 | Japanese                   | SERPINE1 | 4G/5G               | 0.68 | 0.03  |           |          |
| 11776341   | PE              | 133 | 224       | Japanese                   | SERPINE1 | 4G/5G               |      | NS    |           |          |
| 15734083   | PE              | 121 | 214       | Korean                     | SOD2     | V/A                 | 0.85 | NS    |           |          |
| 14638622   | PE              | 180 | 310       | French Canadian            | TGFB1    | R25P                |      | 0.71  | 0.9       | 0.6, 1.5 |
| 12297717   | PE              | 142 | 138       | Australian & New Zealander | THBD     | A455V               | 0.81 | NS    |           |          |
| 12628278   | PE              | 100 | 110       | South-African              | THBD     | A455V               | 0.98 |       |           |          |
| 11776341   | PE              | 133 | 224       | Japanese                   | THBD     | A455V               |      | NS    |           |          |
| 14638622   | PE              | 180 | 310       | French Canadian            | TNF      | G/A-308             | 0.87 | 0.36  | 0.8       | 0.6, 1.2 |
| 11576577   | PE              | 30  | 98        | Dutch                      | TNF      | G/A-308             |      |       |           |          |
| 11576577   | PE              | 30  | 98        | Dutch                      | TNF      | -238                |      |       | 3.8       | 1.6, 8.9 |
| 11576577   | PE              | 30  | 98        | Dutch                      | TNF      | 6 STRP <sup>h</sup> |      |       |           |          |
| 11776341   | PE              | 133 | 224       | Japanese                   | TNF      | G/A-308             |      |       |           |          |
| 11776341   | PE              | 133 | 224       | Japanese                   | TNF      | C/T-857             |      | NS    |           |          |
| 11776341   | PE              | 133 | 224       | Japanese                   | TNF      | C/A-863             |      | NS    |           |          |
| 16021081   | PE              | 150 | 661       | USA                        | TNF      | G/A-308             |      |       | 0.8       | 0.3, 2.6 |
| **15889386 | PE              | 627 |           | British                    | TNF      | A1893G              |      | 0.362 |           |          |
| **15889386 | PE              | 627 |           | British                    | TNF      | G4101A              |      | 0.86  |           |          |
| **15889386 | PE              | 627 |           | British                    | TNF      | G/A-308             |      | 0.402 |           |          |
| **15889386 | PE              | 627 |           | British                    | TNF      | A/G-1082            |      | 0.954 |           |          |
| 9616877    | PE              | 131 | 41        | USA                        | TNFA1    | G/A -308            | 0.85 | NS    |           |          |

- a) HT – Hypertension during pregnancy
- b) IUGR – Intrauterine Growth Restriction
- c) HELLP – Hemolysis, Elevated Liver Enzymes, Low Platelet Count
- d) NS – Not Significant
- f) NA – Not Available
- g) INDEL – Insertion/Deletion
- h) STRP – short tandem repeat polymorphisms
- i) MAF – Major Allele Frequency

\*infants were included in the study

\*\* used mother/father/child trios

**Supplemental Table 3.** Details on SNPs without rs Numbers.

| Gene<br>Symbol | SNP       | Region    | Accession   | Position <sup>a</sup> | Alleles | Sequence Context`            |
|----------------|-----------|-----------|-------------|-----------------------|---------|------------------------------|
| COL4A2         | 633876793 | intron 33 | GPI_24462.1 | 59308                 | G/T     | CTCACCAGA [G/T] TGTTACA      |
| GNB3           | 43188143  | intron 1  | U47924.1    | 4536                  | C/A     | CCCTCCTCC [C/A] GGCTGGGCC    |
| LPL            | 12584682  | promoter  | AC074252.2  | 7308                  | G/A     | TGGTCTCTAT [G/A] GATTTGTCTAT |
| LPL            | 12626985  | exon 2    | AC074252.2  | 46209                 | G/A     | TTTTATC [G/A] ACATCGAAAGTAA  |
| SERPINE1       | 629203538 | exon 9    | AC004876.2  | 33657                 | C/T     | CTTGGAGGAC [C/T] TTTAGGTCAAA |

<sup>a</sup>Position within the sequence corresponding to the accession number.
